# Supplementary material
Source: Springer Nature journal article supplement (https://www.springermedizin.de/resource/supplementary/12872_2013_863_MOESM4_ESM.pdf/9430418)

A

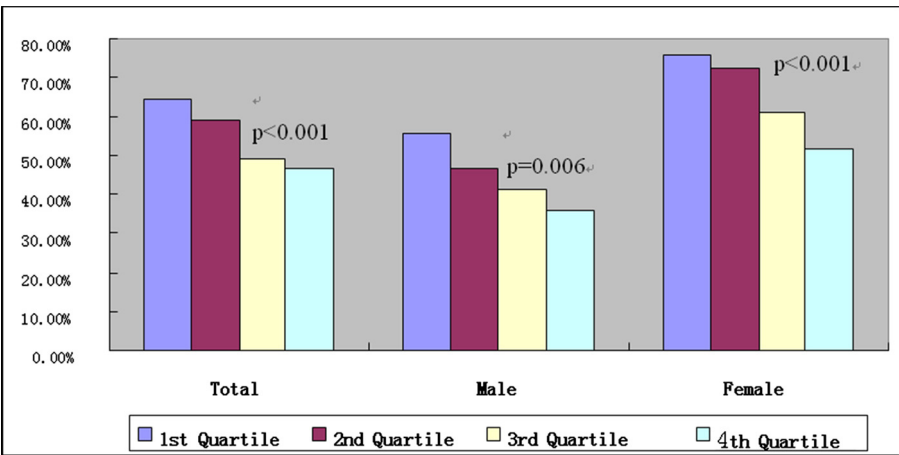

B

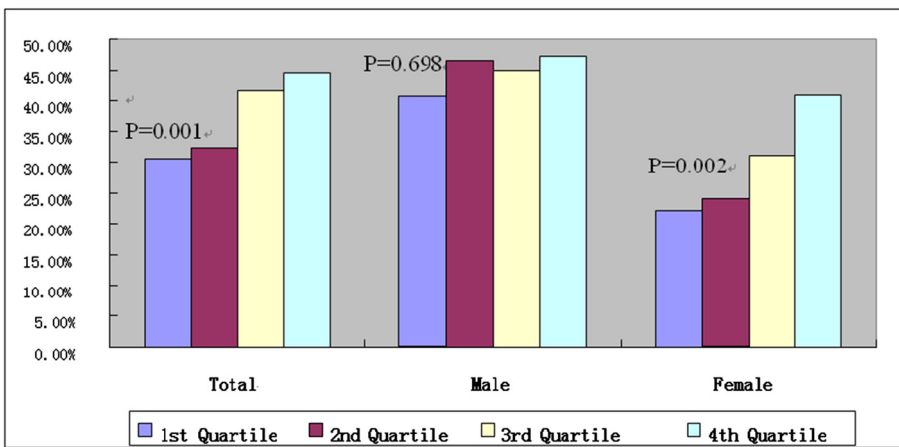

Supplement: MOESM4 [file 9430418]
